# Supplementary material
Source: PubMed Central journal article supplement (PMC10872639)
Supplement: NIHMS1932897-supplement-1.pdf [file NIHMS1932897-supplement-1.pdf]

# Efficacy of a bivalent (D614 + B.1.351) SARS-CoV-2 Recombinant Protein Vaccine with AS03 adjuvant in adults: a Phase 3, multi-country study

## Contents

|                                                                                                                                                                                    |    |
|------------------------------------------------------------------------------------------------------------------------------------------------------------------------------------|----|
| 1.0 Supplementary Methods .....                                                                                                                                                    | 3  |
| 1.1 Sites participating in the study .....                                                                                                                                         | 3  |
| 1.2 Local and regional institutional ethics committees.....                                                                                                                        | 5  |
| 1.3 Participant inclusion/exclusion criteria .....                                                                                                                                 | 6  |
| 1.4 Participants potentially at higher risk of severe COVID-19 .....                                                                                                               | 7  |
| 1.5 Definition of COVID-19 like illness.....                                                                                                                                       | 8  |
| 1.6 Testing procedures and criteria for determination of prior SARS-CoV-2 infection.....                                                                                           | 9  |
| 1.7 Definition of COVID-19 efficacy outcomes .....                                                                                                                                 | 10 |
| 1.8 Safety data .....                                                                                                                                                              | 12 |
| 1.9 Sample size calculations .....                                                                                                                                                 | 13 |
| 1.10 Descriptions of the analysis sets.....                                                                                                                                        | 14 |
| 2.0 Supplementary efficacy data.....                                                                                                                                               | 15 |
| 2.1 CONSORT diagram for participant flow through the study.....                                                                                                                    | 15 |
| 2.2 Reasons for discontinuation .....                                                                                                                                              | 16 |
| 2.3 Main analysis sets by age group, prior SARS-CoV-2 infection at baseline, and presence of high-risk medical conditions .....                                                    | 17 |
| 2.4 High risk medical conditions - SafAS.....                                                                                                                                      | 18 |
| 2.5 Follow-up data – SafAS (PD1) .....                                                                                                                                             | 19 |
| 2.6 Follow-up data – mFAS-PD2 .....                                                                                                                                                | 20 |
| 2.7 Variant distribution by country and calendar time in all participants, regardless of prior SARS-CoV-2 infections (mFAS-PD2) .....                                              | 21 |
| 2.8 Vaccine efficacy - Sensitivity analysis including Ukrainian participants .....                                                                                                 | 22 |
| 2.9 Kaplan-Meier cumulative incidence of symptomatic COVID-19 in the randomized population (overall, naïve and non-naïve populations) from randomisation A. Randomized (all) ..... | 23 |
| 2.10 Survival analyses based on the Stratified Cox proportional hazard model.....                                                                                                  | 26 |
| 2.11 Vaccine efficacy in the mFAS-PD1 subset.....                                                                                                                                  | 27 |
| 2.12 Kaplan-Meier cumulative incidence of symptomatic COVID-19 in the mFAS-PD1 population (overall, naïve and non-naïve populations).....                                          | 28 |
| 2.13 Vaccine efficacy in the mFAS-PD2 population according to country, race/ethnic subgroups and risk of severe disease.....                                                       | 30 |
| 2.14 Vaccine efficacy against asymptomatic SARS-CoV-2 infection in naïve participants .....                                                                                        | 33 |
| 2.15 Cumulative incidence of symptomatic Omicron infections in the mFAS-PD2 set.....                                                                                               | 34 |

|                                                                                                                                          |    |
|------------------------------------------------------------------------------------------------------------------------------------------|----|
| 2.16 Sensitivity analysis: efficacy against Symptomatic COVID-19 caused by Omicron or undefined variants in the mFAS-PD2 population..... | 35 |
| 2.17 Safety overview after injection 1 and injection 2 in all participants – RsafAS/SafAS.....                                           | 36 |
| 2.18 Additional safety outcomes.....                                                                                                     | 38 |

## 1.0 Supplementary Methods

### 1.1 Sites participating in the study

| Principal Investigator  | Location                                                                                                                                           | City         |
|-------------------------|----------------------------------------------------------------------------------------------------------------------------------------------------|--------------|
| <b>Colombia</b>         |                                                                                                                                                    |              |
| Maria Angelica Granados | Centro de Atencion e Investigacion Medica S.A.S. – Caimed S.A.S – sede Bogotá                                                                      | Bogotá       |
| Alberto Cadena Bonfanti | Clinica de la Costa                                                                                                                                | Barranquilla |
| Hugo Macareno Arroyo    | Fundacion Hospital Universidad del Norte                                                                                                           | Soledad      |
| Eduardo Lopez-Medina    | Centro de Estudios en Infectología<br>Pediátrica CEIP, Department of Pediatrics<br>Universidad del Valle and Clinica<br>Imbanaco Grupo Quironsalud | Cali         |
| Humberto Reynales       | Centro de Atención e Investigación Médica<br>S.A.S. – CAIMED Chía                                                                                  | Chía         |
| Jaime Augusto Carrillo  | Centro de Atención e Investigación Médica<br>S.A.S.– CAIMED Girardot                                                                               | Girardot     |
| Jose Accini             | IPS Centro Cientifico                                                                                                                              | Barranquilla |
| Hector Velásquez        | Centro de Atención e Investigación Médica<br>S.A.S. – sede Acacías                                                                                 | Acacias      |
| Edith Rodriguez         | Centro de Atención e investigación Médica<br>CAIMED S.A.S                                                                                          | Aguazul      |
| Erwin Pardo             | Centro de Atencion e investigacion Medica<br>CAIMED SAS                                                                                            | Armenia      |
| <b>Ghana</b>            |                                                                                                                                                    |              |
| Nana Akosua Ansah       | Navrongo Health Research Centre<br>(NHRC)                                                                                                          | Navrongo     |
| Kwaku Poku Asante       | Research and Development Division,<br>Ghana Health Service, Kintampo North<br>Municipality                                                         | Kintampo     |
| John Humphrey Amuasi    | Kwame Nkrumah University of Science<br>and Technology & Kumasi Center for<br>Collaborative Research in Tropical<br>Medicine                        | Kumasi       |
| <b>India</b>            |                                                                                                                                                    |              |
| Manish Jain             | Maharaja Agrasen Superspeciality Hospital                                                                                                          | Jaipur       |
| Jinen Shah              | Aartham Multi Super Speciality Hospital                                                                                                            | Ahmedabad    |
| Chandramani Singh       | All India Institute of Medical Science<br>(AIIMS)                                                                                                  | Patna        |
| Jitendra Singh Kushwaha | Prakhar Hospital Private Limited                                                                                                                   | Kanpur       |
| Satyajit Mohapatra      | SRM Medical College & Research Centre,                                                                                                             | Chennai      |
| Amit Suresh Bhate       | Jeevan Rekha Hospital                                                                                                                              | Belagavi     |
| Nitin Khandelwal        | Vidarbha Institute of Medical Sciences                                                                                                             | Nagpur       |
| Veer Bahadur Singh      | Jawaharlal Nehru Medical College<br>Campus                                                                                                         | Ajmer        |
| Chandan Das             | Institute of Medical Sciences and Sum<br>Hospital                                                                                                  | Bhubaneswar  |
| <b>Kenya</b>            |                                                                                                                                                    |              |
| Videlis Nduba           | Kenya Medical Research Institute- Centre<br>for Respiratory Disease Research                                                                       | Nairobi      |
| Lucas Otieno Tina       | Kenya Medical Research Institute<br>(KEMRI)/USAMRD-Africa/Kenya                                                                                    | Kisumu       |
| Samuel Gurrion Ouma     | Kenya Medical Research Institute CGHR,<br>HIVR Division                                                                                            | Kisumu       |
| Fredrick Sawe           | Kenya Medical Research Institute – US<br>Army Medical Research                                                                                     | Kericho      |
| Abraham Siika           | Moi University CRC                                                                                                                                 | Eldoret      |
| Mansoor Saleh           | Aga Khan University Hospital                                                                                                                       | Nairobi      |
| Kishorchandra Mandaliya | Ganjoni Clinic                                                                                                                                     | Mombasa      |
| Nelly Mugo              | Kenya Medical Research Institute –<br>Partners in Health Research &<br>Development                                                                 | Thika        |
| Janet Oyieko            | Kenya Medical Research Institute – Butere<br>County Hospital                                                                                       | Butere       |
| Elisabeth Bukusi        | Kenya Medical Research Institute – Centre<br>for Microbiological Research, Research<br>Care and Training Program                                   | Kisumu       |
| <b>Mexico</b>           |                                                                                                                                                    |              |
| Luis Espinoza           | Arke SMO SA de CV                                                                                                                                  | Veracruz     |

|                            |                                                                                                                              |             |
|----------------------------|------------------------------------------------------------------------------------------------------------------------------|-------------|
| Maria Otero                | Hospital Civil "Fray Antonio Alcalde"                                                                                        | Guadalajara |
| Rafael Rivero              | Centro de Investigación Clínica del Pacífico S.A. de C.V.                                                                    | Acapulco    |
| Javier Martínez            | Morales Vargas Centro de investigación                                                                                       | León        |
| Sandra Villagómez-Martínez | Hospital General de Temixco, en acuerdo con el Instituto Nacional de Pediatría Unidad de Apoyo a la Investigación Clínica.   | Temixco     |
| Mercedes Paredes           | JM Research SC                                                                                                               | Cuernavaca  |
| Pedro Sánchez              | Instituto Nacional de Pediatría                                                                                              | Coyoacán    |
| <b>Nepal</b>               |                                                                                                                              |             |
| Piush Kanodia              | Nepalgunj Medical college Teaching Hospital                                                                                  | Nepalgunj   |
| Dipesh Tamrakar            | Dhulikhel Hospital, Kathmandu University Hospital                                                                            | Dhulikhel   |
| Santa Kumar Das            | Institute of Medicine, Tribhuvan University                                                                                  | Kathmandu   |
| <b>Uganda</b>              |                                                                                                                              |             |
| Patricia Nahirya Ntege     | Baylor College of Medicine Children's Foundation-Uganda                                                                      | Kampala     |
| Brenda Okech               | Uganda Virus Research Institute (UVRI)- IAVI HIV Vaccine Program LTD. CRS                                                    | Entebbe     |
| Hannah Kibuuka             | Makerere University Walter Reed Project                                                                                      | Kampala     |
| Cissy Kityo Mutuluza       | Joint Clinical Research Centre                                                                                               | Kampala     |
| Anne Wajja                 | Medical Research Council/Uganda Virus Research Institute/London School of Hygiene and Tropical Medicine Uganda Research Unit | Entebbe     |
| Deo Wabwire                | MUJHU Research Collaboration / MUJHU Care Ltd                                                                                | Kampala     |
| Noah Kiwanuka              | Africa Medical And Behavioural Sciences Organisation, Nansana                                                                | Waikso      |
| Francis Kiweewa            | Strengthening Institutional Capacity for Research Administration at Lira Regional Hospital                                   | Lira        |
| <b>Ukraine</b>             |                                                                                                                              |             |
| Svitlana Postol            | Synexus Affiliate - MC of LLC Medbud-Clinic                                                                                  | Kyiv        |
| Hanna Beyko                | Center of Family Medicine Plus LLC                                                                                           | Kyiv        |
| Oleksandra Bilotkach       | AES - AS - Medical Center of Edelweiss Medics LLC                                                                            | Kyiv        |
| Dmytro Dobryanskyi         | Medical Center Medical Clinic Blagomed LLC                                                                                   | Kyiv        |

## 1.2 Local and regional institutional ethics committees

**Colombia:** Comité de Ética en Investigación CAIMED (approved); Comité de Ética en Investigación de la Fundación del Caribe para la Investigación Biomédica (approved); Comité de Ética en Investigación VITA (approved); Corporación Científica Pediátrica Comité de Ética en Investigación Biomédica (approved); Comité de Ética en investigación de la División Ciencias de la Salud de la Universidad del Norte (approved); Comité de Ética en Investigación Clínica de la Costa (approved). **Ghana:** Kwame Nkrumah University of Science and Technology Committee on Human Research, Publication and Ethics (approved); Kintampo Health Research Centre Institutional Ethics Committee (approved); Navrongo Health Research Centre Institutional Review Board (approved); Ghana Health Service Ethics Review Committee (approved). **India:** Institute of Medical Sciences and Sum Hospital Institutional Ethics Committee (approved); Jawahar Lal Nehru Medical College Institutional Ethics Committee (approved); Vidharba Institute of Medical Sciences - Nagpur Institutional Ethics Committee (approved); Jeevan Rekha Hospital Institutional Ethics Committee (approved); SRM Medical College Hospital and Research Centre Institutional Ethics Committee (approved); Prakhar Hospital Institutional Ethics Committee (approved); All India Institute of Medical Sciences Patna Institutional Ethics Committee (approved); Aartham Ethics Committee - Aartham Multi Super Speciality Hospital (approved); Maharaja Agrasen Superspeciality Hospital Institutional Ethics Committee (approved). **Kenya:** Kenya Medical Research Scientific & Institute Ethics Review Unit (approved); Kenyatta National Hospital - University of Nairobi - College of Health Sciences Ethics Review Committee (approved); The Aga Khan University - Nairobi Institutional Ethics Review Committee (approved); Institutional Review Ethics Committee MOI University College of Health - MOI Teaching and Referral Hospital (approved); National Commission for Science Technology and Innovation (approved). **Mexico:** Comité de Ética en Investigación de la Dirección de Investigación del Instituto Nacional de Pediatría; Comité de Ética en Investigación de Médica Sur (approved); Comité de Ética en Investigación Hospital Aranda de la Parra (approved); Comité de Ética en Investigación Hospital Civil de Guadalajara - Sub-Dirección de Enseñanza e Investigación (approved); Comité de Ética en Investigación de Investigación Biomédica para el Desarrollo de Fármacos (approved). **Nepal:** Tribhuvan University Institute of Medicine Institutional Review Committee (approved); Kathmandu University School of Medical Sciences Institutional Review Board (approved); Nepalgunj Medical College Teaching Hospital Institutional Review Committee (approved). **Uganda:** Uganda Virus Research Institute (approved); London School of Hygiene and Tropical Medicine Research Ethics Committee (approved). **Ukraine:** Blagomed Medical Clinic LLC Ethics Commission (approved); Edelweiss Medics LLC (approved); Center of Family Medicine Plus LLC Ethical Committee (approved); Medbud Clinic LLC Ethical Committee (approved).

### 1.3 Participant inclusion/exclusion criteria

Patients are eligible for the study only if all the following criteria are met:

- Aged  $\geq 18$  years on the day of inclusion
- No intention to receive an authorized/approved COVID-19 vaccine outside of the study
- SARS-CoV-2 rapid serodiagnostic test performed at the time of enrolment to detect presence of SARS-CoV-2 antibodies
- For persons living with HIV, their HIV infection must be stable as determined by ongoing anti-retroviral treatment and a CD4 cell count of  $>200$  cells/mm<sup>3</sup>
- Females of childbearing potential must agree to use an effective contraceptive method or remain abstinent from  $\geq 4$  weeks prior to the first study intervention administration until  $\geq 12$  weeks after the second study intervention administration; have a negative highly sensitive pregnancy test  $\leq 25$  hours before any dose of study intervention
- Females of non-childbearing potential must be post-menopausal for  $\geq 1$  year or surgically sterile
- Provision of a signed and dated written informed consent form
- Able to attend all visits and to comply with all study procedures
- Covered by health insurance, if required by local, regional or national regulations

Participants are not eligible for the study if any of the following criteria are met:

- Known systemic hypersensitivity to any of the vaccine components or a history of a life-threatening reaction to a vaccine containing any of the same substances
- Dementia or any other cognitive condition at a stage that could interfere with following the study procedures based on Investigator's judgement
- Self-reported thrombocytopenia, contraindicating intramuscular vaccination based on Investigator's judgement
- Bleeding disorder or receipt of anticoagulants in the past 21 days preceding inclusion, contraindicating intramuscular vaccination based on Investigator's judgement
- Unstable acute or chronic illness that in the opinion of the Investigator or designee poses additional risk as a result of participation or that could interfere with the study procedures
- Moderate or severe acute illness/infection (according to investigator judgement) on the day of vaccination or febrile illness (temperature  $\geq 38^{\circ}\text{C}$  [ $\geq 100.4^{\circ}\text{F}$ ]). A prospective participant should not be included in the study until the condition has resolved or the febrile event has subsided
- Receipt of any vaccine in the 30 days preceding or on the day of the first study vaccination or planned receipt of any vaccine between the first study vaccination and in the 30 days following the second study vaccination except for influenza vaccination, which may be received at any time in relation to study intervention
- Prior administration of a coronavirus vaccine (SARS-CoV-2, SARS-CoV, MERS-CoV)
- Receipt of solid-organ or bone marrow transplants in the past 180 days
- Receipt of anti-cancer chemotherapy in the last 90 days
- Participation at the time of study enrolment (or in the 30 days preceding the first study vaccination) or planned participation during the present study period in another clinical study investigating a vaccine, drug, medical device or medical procedure
- Deprived of freedom by an administrative or court order, or in an emergency setting, or hospitalized involuntarily
- Identified as an Investigator or employee of the Investigator or study center with direct involvement in the proposed study, or identified as an immediate family member (i.e. parent, spouse, natural or adopted child) of the Investigator or employee with direct involvement in the proposed study

## 1.4 Participants potentially at higher risk of severe COVID-19

High-risk conditions are conditions considered to be associated with an increased risk of severe COVID-19 (<https://www.cdc.gov/coronavirus/2019-ncov/need-extra-precautions/evidence-table.html>) and include:

- cancer
- chronic kidney disease
- chronic obstructive pulmonary disease (COPD)
- immunocompromised state from solid organ transplant
- immunocompromised state from other causes (blood or bone marrow transplant, immune deficiencies, HIV, use of corticosteroids, or use of immunosuppressors)
- obesity (body mass index of  $\geq 30$ )
- heart conditions such as heart failure
- coronary artery disease or cardiomyopathies
- sickle cell disease
- thalassemia
- type 1 or type 2 diabetes mellitus
- moderate-to-severe asthma
- cerebrovascular disease
- cystic fibrosis
- hypertension/high blood pressure
- neurologic conditions
- hepatic disease
- pulmonary fibrosis
- smoking

## 1.5 Definition of COVID-19 like illness

New onset or exacerbation of any ONE of the following:

- Fever (measured temperature  $\geq 100.4^{\circ}\text{F}$  OR  $\geq 38.0^{\circ}\text{C}$ )
- Difficulty breathing or shortness of breath
- Altered level of consciousness
- Myocarditis, myocardial infarction
- Thromboembolic event (blood clots [eg, pulmonary embolism, deep vein thrombosis, stroke])
- Purpura fulminans
- Clinical or radiographic evidence of pneumonia
- Chilblains (COVID-toes)

OR

New onset or exacerbation of ANY ONE of the following (that persists for a period of at least 24 hours or reoccurs after a 12-hour period):

- Cough (dry or productive)
- Anosmia or partial loss of smell
- Ageusia or dysgeusia (loss or disturbance of taste)

OR

New onset of any TWO of the following symptoms that are present at the same time (both symptoms that persist for a period of at least 24 hours or reoccur after a 12-hour period):

- Sore throat
- Chills
- Myalgia
- Fatigue
- Malaise
- Headache
- Rhinorrhea or nasal congestion
- Abdominal pain
- At least one of nausea, diarrhea, vomiting



## 1.6 Testing procedures and criteria for determination of prior SARS-CoV-2 infection

Participants were classified as naïve or non-naïve at Day 1 and Day 22 or Day 1 or Day 22 by assessment of blood samples using Elecsys electrochemiluminescence immunoassays for detection of anti-S antibodies (Elecsys Anti-SARS-CoV-2 S assay; Roche, Indianapolis, IN, USA) on study Day 1 and for detection of anti-nucleocapsid antibodies (Elecsys Anti- SARS-CoV-2 N; Roche) on study Days 1 and 22; and detection of SARS-CoV-2 nucleic acids in nasopharyngeal swabs using nucleic-acid amplification tests (NAAT; Abbott RealTime SARS-CoV-2 assay; Abbott Molecular, Des Plaines, IL, USA) on study Days 1 and 22. Analyses were done according to the manufacturers' instructions. Participants were defined as naïve to SARS-CoV-2 on study Days 1 and 22 if they tested negative for anti-S antibodies on study Day 1 and for both anti-nucleocapsid antibodies and SARS-CoV-2 nucleic acids on Days 1 and 22; we defined participants as non-naïve if they tested positive on at least one of the three tests on study Days 1, 22, or both.

The prior SARS-CoV-2 infection status of all randomized participants were defined in accordance with the below criteria.

| <b>Prior SARs-CoV-2 infection status</b>                      | <b>Description</b>                                                                                                                                                                                                                                                                                                                                                                                |
|---------------------------------------------------------------|---------------------------------------------------------------------------------------------------------------------------------------------------------------------------------------------------------------------------------------------------------------------------------------------------------------------------------------------------------------------------------------------------|
| SARS-CoV-2 Naïve at baseline (Naïve-D1)                       | <ul style="list-style-type: none"> <li>• Negative by the anti-S immunoassay (Roche Elecsys) on D01 serum sample</li> </ul> <p>AND</p> <ul style="list-style-type: none"> <li>• Negative by the anti-N immunoassay on D01 serum sample</li> </ul> <p>AND</p> <ul style="list-style-type: none"> <li>• Negative NAAT for SARS-CoV-2 on respiratory sample collected on D01</li> </ul>               |
| SARS-CoV-2 Non-Naïve at baseline (Non-Naïve-D1)               | <ul style="list-style-type: none"> <li>• Positive by the anti-S immunoassay (Roche Elecsys) on D01 serum sample</li> </ul> <p>OR</p> <ul style="list-style-type: none"> <li>• Positive by the anti-N immunoassay on D01 serum sample</li> </ul> <p>OR</p> <ul style="list-style-type: none"> <li>• Positive NAAT for SARS-CoV-2 on respiratory sample collected on D01</li> </ul>                 |
| SARS-CoV-2 Naïve at second injection (Naïve-D1+D22)           | <ul style="list-style-type: none"> <li>• Negative by the anti-S immunoassay (Roche Elecsys) on D01 serum sample</li> </ul> <p>AND</p> <ul style="list-style-type: none"> <li>• Negative by anti-N immunoassay on D01 and D22 serum samples</li> </ul> <p>AND</p> <ul style="list-style-type: none"> <li>• Negative NAAT for SARS-CoV-2 on respiratory samples collected on D01 and D22</li> </ul> |
| SARS-CoV-2 Non-Naïve at second injection (Non-Naïve - D1/D22) | <ul style="list-style-type: none"> <li>• Positive by the anti-S immunoassay (Roche Elecsys) on D01 serum sample</li> </ul> <p>OR</p> <ul style="list-style-type: none"> <li>• Positive by the anti-N immunoassay on D01 or D22 serum samples</li> </ul> <p>OR</p> <ul style="list-style-type: none"> <li>• Positive NAAT for SARS-CoV-2 on respiratory samples collected on D01 or D22</li> </ul> |

## 1.7 Definition of COVID-19 efficacy outcomes

### **Virologically confirmed SARS-CoV-2 infection**

Defined as a positive result for SARS CoV-2 by NAAT on at least one respiratory sample. This includes positive results by any NAAT including tests performed outside the study protocol if confirmed by the adjudication committee.

### **Symptomatic COVID-19**

Defined as virologically confirmed SARS-CoV-2 infection accompanied by protocol-defined COVID-19-like illness.

### **Asymptomatic SARS-CoV-2 infection**

Defined as SARS-CoV-2 infection, with no reported COVID-19-like illness episodes between enrolment and 14 days after the timepoint at which SARS-CoV-2 infection is ascertained, based on samples taken during previous visits.

### **Hospitalized COVID-19**

Defined as an episode of Symptomatic COVID-19 that requires inpatient hospitalization.

### **Moderate COVID-19**

Defined as Symptomatic COVID-19 with:

- Shortness of breath that persists for at least 12 hours

OR

- Clinical signs of moderate illness measured at least on two occasions separated by 30 mins (respiratory rate [RR]  $\geq 20$  breaths per minute at rest AND heart rate [HR]  $\geq 90$  beats per minute at rest)

AND

- No clinical signs indicative of severe COVID-19

### **Severe COVID-19: defined as COVID-19 with any one of the following:**

- Any clinical signs of severe illness measured at least on 2 occasions separated by 30 minutes (saturation of oxygen [SpO<sub>2</sub>]  $\leq 93\%$  on room air (corrected for altitude), PaO<sub>2</sub>/FiO<sub>2</sub>  $< 300$  mm Hg, RR  $\geq 30$  breaths per minute at rest, HR  $\geq 125$  beats per minute at rest)
- Supplemental oxygen administration for  $> 1$  hour
- Use of invasive or non-invasive ventilation or Extracorporeal Membrane Oxygenation
- Clinical diagnosis of respiratory failure (ie, clinical need for one of the preceding therapies, but preceding therapies not able to be administered in setting of resource limitation)
- Significant acute renal, hepatic, or neurologic dysfunction
- Shock (defined by systolic blood pressure  $< 90$  mm Hg, or diastolic blood pressure  $< 60$  mm Hg or requiring vasopressors)
- Admission to an ICU
- Death

### **COVID-19 severity scale**

The COVID-19 severity scale is based on the ordinal scale of clinical assessment:

1. Death
2. Hospitalized, on invasive mechanical ventilation or extracorporeal membrane oxygenation
3. Hospitalized, on non-invasive ventilation or high flow oxygen devices
4. Hospitalized, requiring supplemental oxygen

5. Hospitalized, not requiring supplemental oxygen – discharged but requiring ongoing medical care (COVID-19 related or otherwise)
6. Hospitalized, not requiring supplemental oxygen – discharged without ongoing medical care
7. Not hospitalized

**Death associated with COVID-19**

Death associated with COVID-19 is defined as death in a participant with COVID-19 who died within 28 days of the first positive specimen date if association confirmed by adjudication committee OR died more than 28 days after the first specimen date and COVID-19 is mentioned as an immediate or underlying cause of death on the death certificate if association confirmed by the adjudication committee.

## 1.8 Safety data

Safety data included all immediate unsolicited systemic AEs within 30 minutes of each injection, medically attended AEs (MAAEs), serious AEs (SAEs), AEs of special interest (AESIs) including potential immune-mediated diseases (pIMDs).

AESIs included:

- Anaphylactic reactions
- Generalized convulsion
- Thrombocytopenia
- Thrombosis with Thrombocytopenia Syndrome
- Myocarditis
- Pericarditis
- New onset and worsening of potential immune-mediated diseases

## 1.9 Sample size calculations

It was estimated that a sample of 10,886 participants would be required, with approximately 125 symptomatic COVID-19 cases needed to achieve 80% statistical power. Participants were enrolled and randomized with allocation ratio (1:1) into the vaccine group and the placebo group. Among those, the planned target for SARS-CoV-2 non-naïve participants was approximately 3,266 participants (1,633 per arm). The sample size of 7,620 SARS-CoV-2 naïve participants was powered independently to demonstrate the primary objective of vaccine efficacy (VE) against symptomatic COVID-19 in SARS-CoV-2 naïve adults; however, only 1,176 were naïve at D1. Of note, the primary endpoint, including both naïve and non-naïve participants, was changed after enrollment was already completed; therefore, sample size calculations were based on a primary endpoint that considered only naïve participants. The power of primary efficacy analysis is driven by the total number of symptomatic COVID-19 events.

The incidence rate of symptomatic COVID-19 in Placebo is assumed as 2.25% illness rate per 2-months follow-up period. An attrition rate of 30% was expected, as, during the conduct of the study, a greater proportion of the cohort became eligible to receive locally available authorized COVID-19 vaccines.

The power of primary efficacy analysis was driven by the total number of symptomatic COVID-19 events. Because Omicron was the prevalent variant during case accrual for Stage 2 and the expected VE against Omicron was expected to be lower than the original assumption of 70%,<sup>1</sup> the expected true VE for symptomatic COVID-19 for Stage 2 was estimated at 60%. Therefore, a total of approximately 125 symptomatic COVID-19 events was required to achieve 80% power with one-sided type I error rate of 0.025, assuming no interim analysis. For interim analyses, type I error rate was adjusted appropriately. If the planned interim analysis was skipped, or if the information fraction is different than planned (not within the range of 50% to 70% data), alpha splitting was adjusted based on the Lan-DeMets O'Brien-Fleming approximation spending function approach for interim and final efficacy analysis, if applicable.

For the primary endpoint, the confidence intervals (CI) corresponding to vaccine efficacy estimates were calculated by an exact method,<sup>2</sup> assuming a binomial distribution of the number of cases in the vaccine group, conditional to the total number of cases.

For other analyses, an unadjusted 95% CI was calculated.

## 1.10 Descriptions of the analysis sets

| <b>Population</b>                                 | <b>Description</b>                                                                                                                                                                                                                                                                                                                                                                                                                                                                                                                |
|---------------------------------------------------|-----------------------------------------------------------------------------------------------------------------------------------------------------------------------------------------------------------------------------------------------------------------------------------------------------------------------------------------------------------------------------------------------------------------------------------------------------------------------------------------------------------------------------------|
| Screened                                          | All participants screened for potential study enrolment will be included regardless of being enrolled or not being enrolled. The screening includes the SARS-CoV-2 rapid serodiagnosis test results, demographic information (age, ethnic/racial population, high-risk medical conditions), and inclusion/exclusion criteria. The participants reaching the enrolment cap identified in interactive response technology will be excluded from the study enrolment and will have no participant ID assigned.                       |
| Randomized                                        | All participants with a randomized group that has been allocated by IRT                                                                                                                                                                                                                                                                                                                                                                                                                                                           |
| Full analysis set (FAS)                           | All randomized participants who receive at least one study injection.<br>Participants will be analyzed according to the intervention to which they were randomized                                                                                                                                                                                                                                                                                                                                                                |
| Safety Analysis Set (SafAS)                       | All randomized participants who have received at least one dose of the study vaccine or placebo and with documented safety data. All participants will have their safety analysed after each dose according to the intervention they actually received, and after any dose according to the intervention received at the first dose. Safety data recorded for participants not administered a study intervention will be excluded from the analysis (and listed separately).                                                      |
| Reactogenicity Safety Analysis Subset (RsafAS)    | Subset of the SafAS and comprising all participants who receive at least one study injection and are randomized into the reactogenicity subset and who have reported reactogenicity data.                                                                                                                                                                                                                                                                                                                                         |
| Modified Full Analysis Set post-dose 1 (mFAS-PD1) | Subset of the FAS excluding: <ul style="list-style-type: none"> <li>• Participants with onset of symptomatic COVID-19 episode between the date of the first injection and 14 days after the first injection</li> <li>• Participant discontinued from study before 14 days after the first injection</li> </ul>                                                                                                                                                                                                                    |
| Modified Full Analysis Set post-dose 2 (mFAS-PD2) | Subset of the FAS excluding: <ul style="list-style-type: none"> <li>• Participants who did not complete the vaccination schedule (2 injections)</li> <li>• Participants with onset of symptomatic COVID-19 episode between the date of the first injection and before 14 days after the second injection</li> <li>• Participant received the second injection despite meeting any of the definitive contraindication criteria</li> <li>• Participant discontinued from study before 14 days after the second injection</li> </ul> |

## 2.0 Supplementary efficacy data

### 2.1 CONSORT diagram for participant flow through the study

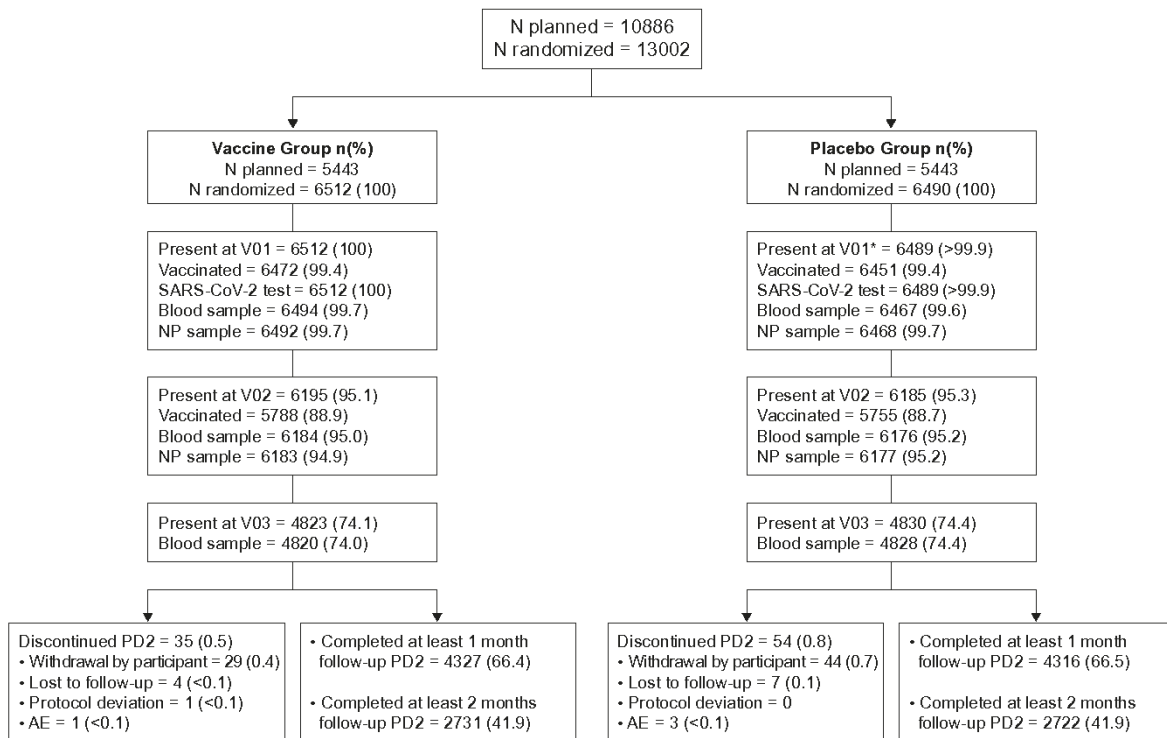

Data are presented as number (%). \*V1 for one participant did not appear in the database during the data extraction dated 09 June 2022 because the site was entering additional data for V01 at the time the data extraction was performed. However, this participant was included in mFAS-PD1, mFAS-PD2, mFAS-PD2 Non-naïve-D01/D22 analysis sets because both V01 and V02 were performed. Abbreviations: AE, adverse event. NP, nasopharyngeal. PD2, post dose 2. V, visit.

## 2.2 Reasons for discontinuation

|                                                   | Vaccine group (N=6512) | Placebo group (N=6490) | All (N=13002) |
|---------------------------------------------------|------------------------|------------------------|---------------|
| <b>Overall (n=414)</b>                            |                        |                        |               |
| Adverse event*, n (%)                             | 4 (<0.1)               | 5 (<0.1)               | 9 (<0.1)      |
| Protocol deviation, n (%)                         | 26 (0.4)               | 23 (0.4)               | 49 (0.4)      |
| Withdrawal by subject, n (%)                      | 146 (2.2)              | 160 (2.2)              | 306 (2.4)     |
| Lost to follow-up, n (%)                          | 26 (0.4)               | 24 (0.4)               | 50 (0.4)      |
| <b>Discontinued after second injection (n=89)</b> |                        |                        |               |
| Adverse event*, n (%)                             | 1 (<0.1)               | 3 (<0.1)               | 4 (<0.1)      |
| Protocol deviation, n (%)                         | 1 (<0.1)               | 0                      | 1 (<0.1)      |
| Withdrawal by subject, n (%)                      | 29 (0.4)               | 44 (0.7)               | 73 (0.6)      |
| Lost to follow-up, n (%)                          | 4 (<0.1)               | 7 (0.1)                | 11 (<0.1)     |

\*All adverse events were assessed as unrelated to the study intervention.



## 2.3 Main analysis sets by age group, prior SARS-CoV-2 infection at baseline, and presence of high-risk medical conditions

|                                             |          | <b>Vaccine group<br/>(N=6,512)<br/>n</b> | <b>Placebo group<br/>(N=6,490)<br/>n</b> |
|---------------------------------------------|----------|------------------------------------------|------------------------------------------|
| Overall                                     | FAS      | 6,472                                    | 6,452                                    |
|                                             | mFAS-PD2 | 5,736                                    | 5,680                                    |
|                                             | SafAS    | 6,472                                    | 6,450                                    |
|                                             | RSafAS   | 2,433                                    | 2,418                                    |
| 18–59 years                                 | FAS      | 6,078                                    | 6,069                                    |
|                                             | mFAS-PD2 | 5,404                                    | 5,350                                    |
|                                             | SafAS    | 6,078                                    | 6,067                                    |
|                                             | RsafAS   | 2,040                                    | 2,037                                    |
| ≥60 years                                   | FAS      | 394                                      | 383                                      |
|                                             | mFAS-PD2 | 332                                      | 330                                      |
|                                             | SafAS    | 394                                      | 383                                      |
|                                             | RsafAS   | 393                                      | 381                                      |
| Naïve at D1                                 | FAS      | 588                                      | 588                                      |
|                                             | mFAS-PD1 | 577                                      | 576                                      |
|                                             | SafAS    | 588                                      | 588                                      |
|                                             | RsafAS   | 332                                      | 347                                      |
| Non-naïve at D1                             | FAS      | 4,860                                    | 4,833                                    |
|                                             | mFAS-PD1 | 4,826                                    | 4,793                                    |
|                                             | SafAS*   | 4,860                                    | 4,831                                    |
|                                             | RsafAS   | 1,835                                    | 1,802                                    |
| Naïve at D1 and D22                         | FAS      | 333                                      | 350                                      |
|                                             | mFAS-PD2 | 327                                      | 343                                      |
| Non-naïve at D1 or D22                      | FAS      | 5,478                                    | 5,488                                    |
|                                             | mFAS-PD2 | 4,841                                    | 4,818                                    |
| Presence of high-risk medical conditions    | FAS      | 2,095                                    | 2,070                                    |
|                                             | mFAS-PD2 | 1,793                                    | 1,786                                    |
|                                             | SafAS    | 2,095                                    | 2,070                                    |
|                                             | RsafAS   | 869                                      | 862                                      |
| No presence of high-risk medical conditions | FAS      | 4,377                                    | 4,382                                    |
|                                             | mFAS-PD2 | 3,943                                    | 3,894                                    |
|                                             | SafAS    | 4,377                                    | 4,380                                    |
|                                             | RsafAS   | 1,564                                    | 1,556                                    |

N=number of randomised participants.

Abbreviations: FAS, Full analysis set; mFAS-PD1, modified full analysis set post-dose 1; mFAS-PD2, modified full analysis set post-dose 2; RsafAS, reactogenicity safety analysis set; SafAS, safety analysis set.

\*The product received by two participants (i.e. vaccine or placebo) could not be determined; therefore, there is a difference of two participants between the FAS and the SafAS; the same difference is observed between the FAS and SafAS post-dose 1.

## 2.4 High risk medical conditions - SafAS

|                                                          | Vaccine group (N=6,472) n (%) | Placebo group (N=6,450) n (%) | Total (N=12,924) n (%) |
|----------------------------------------------------------|-------------------------------|-------------------------------|------------------------|
| No                                                       | 4377 (67.6)                   | 4380 (67.9)                   | 8759 (67.8)            |
| At least one high-risk medical condition                 | 2095 (32.4)                   | 2070 (32.1)                   | 4165 (32.2)            |
| Smoking                                                  | 1068 (16.5)                   | 1040 (16.1)                   | 2108 (16.3)            |
| Obesity (body mass index of 30 or higher)                | 616 (9.5)                     | 580 (9.0)                     | 1196 (9.3)             |
| Immunocompromised State from Other Causes                | 323 (5.0)                     | 342 (5.3)                     | 665 (5.1)              |
| Hypertension / High Blood Pressure                       | 281 (4.3)                     | 309 (4.8)                     | 590 (4.6)              |
| Type 2 Diabetes Mellitus                                 | 92 (1.4)                      | 84 (1.3)                      | 176 (1.4)              |
| Moderate to Severe Asthma                                | 24 (0.4)                      | 22 (0.3)                      | 46 (0.4)               |
| Chronic Kidney Disease                                   | 11 (0.2)                      | 9 (0.1)                       | 20 (0.2)               |
| Hepatic Disease                                          | 11 (0.2)                      | 7 (0.1)                       | 18 (0.1)               |
| Neurologic Conditions                                    | 10 (0.2)                      | 8 (0.1)                       | 18 (0.1)               |
| Type 1 Diabetes Mellitus                                 | 8 (0.1)                       | 9 (0.1)                       | 17 (0.1)               |
| Cardiovascular Disorder / Heart Failure                  | 7 (0.1)                       | 9 (0.1)                       | 16 (0.1)               |
| Cancer                                                   | 7 (0.1)                       | 4 (<0.1)                      | 11 (<0.1)              |
| Coronary Artery Disease or Cardiomyopathies              | 8 (0.1)                       | 3 (<0.1)                      | 11 (<0.1)              |
| Chronic Obstructive Pulmonary Disease                    | 6 (<0.1)                      | 4 (<0.1)                      | 10 (<0.1)              |
| Immunocompromised State from Solid Organ Transplantation | 4 (<0.1)                      | 1 (<0.1)                      | 5 (<0.1)               |
| Sickle Cell Disease                                      | 3 (<0.1)                      | 0                             | 3 (<0.1)               |

SafAS, safety analysis set.

## 2.5 Follow-up data – SafAS (PD1)

|                                              | Vaccine group | Placebo group | Total |
|----------------------------------------------|---------------|---------------|-------|
| All                                          |               |               |       |
| Follow-up duration,* days                    | 148           | 148           | 148   |
| Median subject follow-up duration,† days     | 85            | 85            | 85    |
| Total follow-up duration,‡ 1000-person years | 1·335         | 1·335         | ..    |
| Aged 18–25 years                             |               |               |       |
| Follow-up duration,* days                    | 147           | 148           | 148   |
| Median subject follow-up duration,† days     | 79            | 83            | 82    |
| Total follow-up duration,‡ 1000-person years | 0·320         | 0·322         | ..    |
| Aged 18–59 years                             |               |               |       |
| Follow-up duration,* days                    | 148           | 148           | 148   |
| Median subject follow-up duration,† days     | 85            | 85            | 85    |
| Total follow-up duration,‡ 1000-person years | 1·256         | 1·259         | ..    |
| Aged ≥60 years                               |               |               |       |
| Follow-up duration,* days                    | 124           | 125           | 125   |
| Median subject follow-up duration,† days     | 76            | 71            | 72    |
| Total follow-up duration,‡ 1000-person years | 0·079         | 0·076         | ..    |
| Aged 18–64 years                             |               |               |       |
| Follow-up duration,* days                    | 148           | 148           | 148   |
| Median subject follow-up duration,† days     | 85            | 85            | 85    |
| Total follow-up duration,‡ 1000-person years | 1·300         | 1·296         | ..    |
| Aged ≥65 years                               |               |               |       |
| Follow-up duration,* days                    | 124           | 124           | 124   |
| Median subject follow-up duration,† days     | 76            | 76            | 76    |
| Total follow-up duration,‡ 1000-person years | 0·034         | 0·039         | ..    |

\*Follow-up duration: data cut-off date – minimum of all SafAS subjects (Visit 01 date) + 1.

†Subject follow-up duration: minimum (data cut-off date, termination date or death date) – Visit 01 date + 1.

‡Total study follow-up duration: sum of subject follow-up duration / (365·25 \* 1000)

PD1. Post dose 1; SafAS, safety analysis set.

## 2.6 Follow-up data – mFAS-PD2

|                                              | Vaccine group | Placebo group | Total |
|----------------------------------------------|---------------|---------------|-------|
| All                                          |               |               |       |
| Follow-up duration,* days                    | 118           | 118           | 118   |
| Median subject follow-up duration,† days     | 58            | 58            | 58    |
| Total follow-up duration,‡ 1000-person years | 0.824         | 0.818         | ..    |
| Aged 18–25 years                             |               |               |       |
| Follow-up duration,* days                    | 117           | 118           | 118   |
| Median subject follow-up duration,† days     | 56            | 57            | 56    |
| Total follow-up duration,‡ 1000-person years | 0.191         | 0.192         | ..    |
| Aged 18–59 years                             |               |               |       |
| Follow-up duration,* days                    | 118           | 118           | 118   |
| Median subject follow-up duration,† days     | 58            | 58            | 58    |
| Total follow-up duration,‡ 1000-person years | 0.779         | 0.773         | ..    |
| Aged ≥60 years                               |               |               |       |
| Follow-up duration,* days                    | 100           | 104           | 104   |
| Median subject follow-up duration,† days     | 54            | 50            | 51    |
| Total follow-up duration,‡ 1000-person years | 0.045         | 0.045         | ..    |
| Aged 18–64 years                             |               |               |       |
| Follow-up duration,* days                    | 118           | 118           | 118   |
| Median subject follow-up duration,† days     | 58            | 58            | 58    |
| Total follow-up duration,‡ 1000-person years | 0.803         | 0.795         | ..    |
| Aged ≥65 years                               |               |               |       |
| Follow-up duration,* days                    | 100           | 100           | 100   |
| Median subject follow-up duration,† days     | 56            | 51            | 55    |
| Total follow-up duration,‡ 1000-person years | 0.021         | 0.023         | ..    |

\*Follow-up duration: Data cut-off date - Minimum of all mFAS-PD2 subjects (date of V02) + 1. †Subject follow-up duration: Minimum (data cut-off date, termination date, or death date) - V02 date + 1. ‡Total follow-up duration: Sum of subject follow-up duration / (365.25 \* 1000)

mFAS-PD2, modified full analysis set post-dose 2.

## 2.7 Variant distribution by country and calendar time in all participants, regardless of prior SARS-CoV-2 infections (mFAS-PD2)

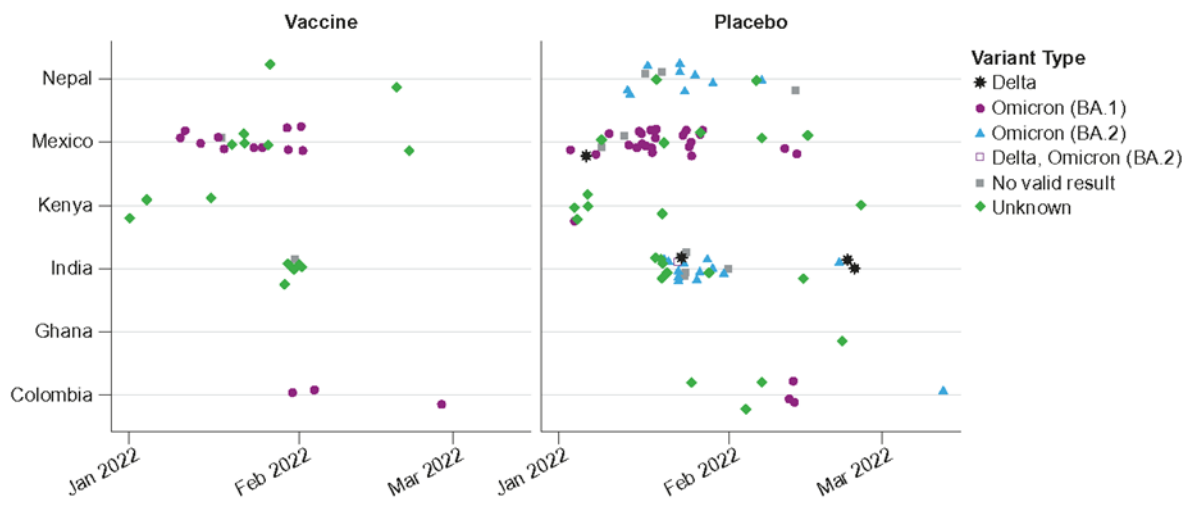

## 2.8 Vaccine efficacy - Sensitivity analysis including Ukrainian participants

|                      | Vaccine group (N=5876) |                           |                         | Placebo group (N=5802) |                           |                         | Vaccine efficacy |              |
|----------------------|------------------------|---------------------------|-------------------------|------------------------|---------------------------|-------------------------|------------------|--------------|
|                      | Cases                  | 1000 person years at risk | Incidence rate (95% CI) | Cases                  | 1000 person years at risk | Incidence rate (95% CI) | %                | 95% CI       |
| Symptomatic COVID-19 | 33                     | 0.609                     | 54.22 (37.32; 76.14)    | 90                     | 0.597                     | 150.75 (121.22; 185.30) | 64.0             | (45.9; 76.6) |

Cases: number of subjects with  $\geq 1$  occurrence of relevant endpoint from 14 days post-injection 1 in the analysis population. CI, confidence interval.

2.9 Kaplan-Meier cumulative incidence of symptomatic COVID-19 in the randomized population (overall, naïve and non-naïve populations) from randomisation A. Randomized (all)

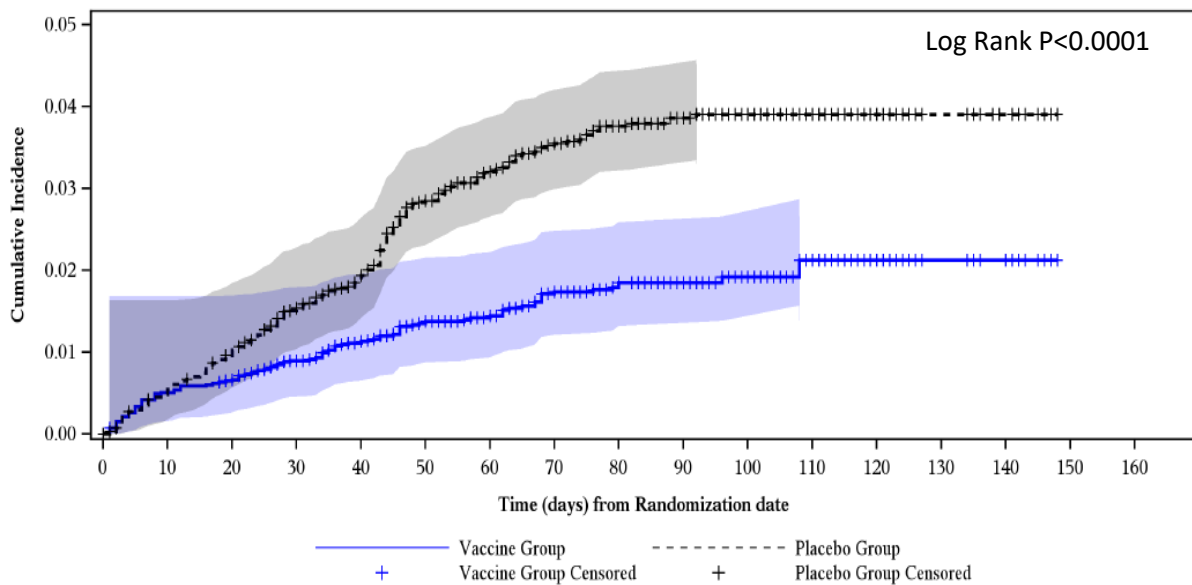

|                                  | 0               | 10                                     | 20                                     | 30                                     | 40                                     | 50                                     | 60                                     | 70                                     | 80                                     | 90                                     | 100                                    | 110                                    | 120                                    | 130                                    | 140                                    | 148                                    |                                        |
|----------------------------------|-----------------|----------------------------------------|----------------------------------------|----------------------------------------|----------------------------------------|----------------------------------------|----------------------------------------|----------------------------------------|----------------------------------------|----------------------------------------|----------------------------------------|----------------------------------------|----------------------------------------|----------------------------------------|----------------------------------------|----------------------------------------|----------------------------------------|
| <b>Number at risk (censored)</b> |                 |                                        |                                        |                                        |                                        |                                        |                                        |                                        |                                        |                                        |                                        |                                        |                                        |                                        |                                        |                                        |                                        |
| Vaccine                          | 65<br>12<br>(0) | 642<br>9<br>(50)                       | 641<br>7<br>(53)                       | 634<br>6<br>(10<br>8)                  | 571<br>5<br>(72<br>6)                  | 478<br>6<br>(16<br>42)                 | 426<br>2<br>(21<br>63)                 | 384<br>7<br>(25<br>66)                 | 344<br>3<br>(29<br>67)                 | 246<br>6<br>(39<br>42)                 | 858<br>(55<br>49)                      | 454<br>(59<br>52)                      | 158<br>(62<br>48)                      | 23<br>(63<br>83)                       | 19<br>(63<br>87)                       | 0<br>(64<br>06)                        |                                        |
| Placebo                          | 64<br>90<br>(0) | 640<br>6<br>(53)                       | 637<br>1<br>(57)                       | 629<br>2<br>(10<br>1)                  | 565<br>8<br>(71<br>4)                  | 471<br>9<br>(16<br>00)                 | 418<br>6<br>(21<br>17)                 | 378<br>1<br>(25<br>08)                 | 337<br>2<br>(29<br>08)                 | 239<br>(38<br>82)                      | 841<br>(54<br>35)                      | 441<br>(58<br>35)                      | 152<br>(61<br>24)                      | 23<br>(62<br>50)                       | 18<br>(62<br>58)                       | 0<br>(62<br>76)                        |                                        |
| <b>Cumulative events</b>         |                 |                                        |                                        |                                        |                                        |                                        |                                        |                                        |                                        |                                        |                                        |                                        |                                        |                                        |                                        |                                        |                                        |
| Vaccine                          | 0               | 33                                     | 43                                     | 58                                     | 72                                     | 85                                     | 88                                     | 100                                    | 104                                    | 104                                    | 105                                    | 106                                    | 106                                    | 106                                    | 106                                    | 106                                    |                                        |
| Placebo                          | 0               | 35                                     | 66                                     | 99                                     | 123                                    | 172                                    | 188                                    | 202                                    | 210                                    | 213                                    | 214                                    | 214                                    | 214                                    | 214                                    | 214                                    | 214                                    |                                        |
| <b>Estimate (95% CI)</b>         |                 |                                        |                                        |                                        |                                        |                                        |                                        |                                        |                                        |                                        |                                        |                                        |                                        |                                        |                                        |                                        |                                        |
| Vaccine                          | 0               | 0.0<br>05<br>(0.0<br>02;<br>0.0<br>17) | 0.0<br>07<br>(0.0<br>03;<br>0.0<br>17) | 0.0<br>09<br>(0.0<br>04;<br>0.0<br>18) | 0.0<br>11<br>(0.0<br>07;<br>0.0<br>20) | 0.0<br>14<br>(0.0<br>09;<br>0.0<br>22) | 0.0<br>14<br>(0.0<br>09;<br>0.0<br>22) | 0.0<br>17<br>(0.0<br>12;<br>0.0<br>25) | 0.0<br>18<br>(0.0<br>13;<br>0.0<br>26) | 0.0<br>18<br>(0.0<br>13;<br>0.0<br>26) | 0.0<br>19<br>(0.0<br>14;<br>0.0<br>27) | 0.0<br>21<br>(0.0<br>16;<br>0.0<br>29) | 0.0<br>21<br>(0.0<br>16;<br>0.0<br>29) | 0.0<br>21<br>(0.0<br>16;<br>0.0<br>29) | 0.0<br>21<br>(0.0<br>16;<br>0.0<br>29) | 0.0<br>21<br>(0.0<br>16;<br>0.0<br>29) | 0.0<br>21<br>(0.0<br>16;<br>0.0<br>29) |
| Placebo                          | 0               | 0.0<br>05<br>(0.0<br>02;<br>0.0<br>16) | 0.0<br>10<br>(0.0<br>06;<br>0.0<br>18) | 0.0<br>15<br>(0.0<br>10;<br>0.0<br>23) | 0.0<br>19<br>(0.0<br>14;<br>0.0<br>26) | 0.0<br>29<br>(0.0<br>23;<br>0.0<br>35) | 0.0<br>32<br>(0.0<br>27;<br>0.0<br>39) | 0.0<br>35<br>(0.0<br>30;<br>0.0<br>42) | 0.0<br>38<br>(0.0<br>32;<br>0.0<br>45) | 0.0<br>39<br>(0.0<br>33;<br>0.0<br>45) | 0.0<br>39<br>(0.0<br>33;<br>0.0<br>46) |

## B. Randomized (naïve Day 01)

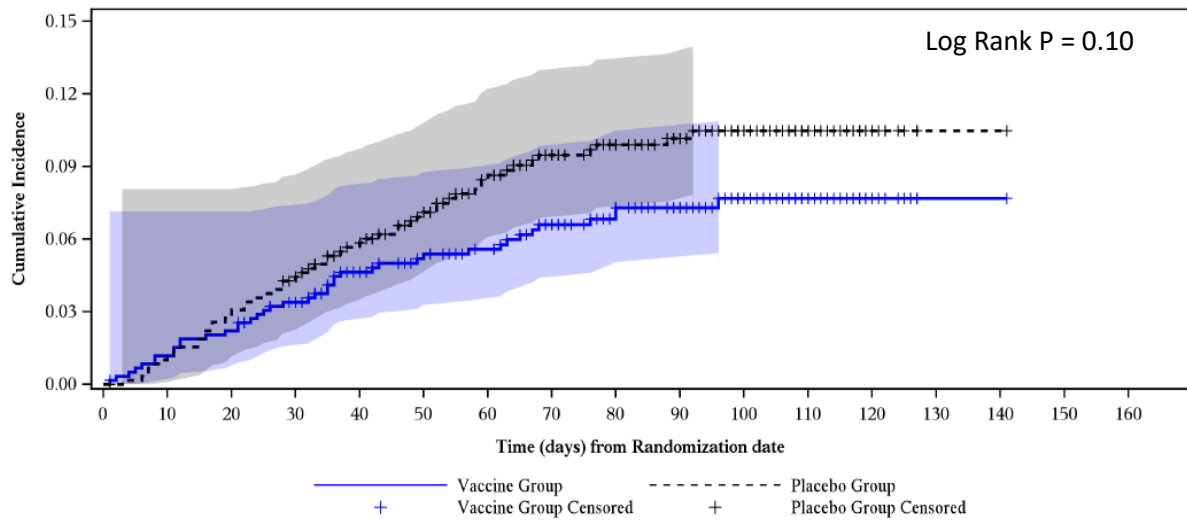

|                                  | 0       | 10                   | 20                   | 30                   | 40                   | 50                   | 60                   | 70                   | 80                   | 90                   | 100                  | 110                  | 120                  | 130                  | 140                  | 141                  |
|----------------------------------|---------|----------------------|----------------------|----------------------|----------------------|----------------------|----------------------|----------------------|----------------------|----------------------|----------------------|----------------------|----------------------|----------------------|----------------------|----------------------|
| <b>Number at risk (censored)</b> |         |                      |                      |                      |                      |                      |                      |                      |                      |                      |                      |                      |                      |                      |                      |                      |
| Vaccine                          | 589 (0) | 581 (1)              | 575 (1)              | 563 (6)              | 530 (32)             | 503 (56)             | 479 (78)             | 446 (106)            | 391 (158)            | 321 (228)            | 171 (37)             | 86 (462)             | 30 (518)             | 1 (547)              | 1 (547)              | 0 (548)              |
| Placebo                          | 588 (0) | 579 (3)              | 569 (3)              | 558 (5)              | 531 (24)             | 501 (47)             | 468 (73)             | 432 (103)            | 387 (147)            | 323 (209)            | 164 (367)            | 87 (444)             | 29 (502)             | 1 (530)              | 1 (530)              | 0 (531)              |
| <b>Cumulative events</b>         |         |                      |                      |                      |                      |                      |                      |                      |                      |                      |                      |                      |                      |                      |                      |                      |
| Vaccine                          | 0       | 7                    | 13                   | 20                   | 27                   | 31                   | 32                   | 37                   | 40                   | 40                   | 41                   | 41                   | 41                   | 41                   | 41                   | 41                   |
| Placebo                          | 0       | 7                    | 18                   | 26                   | 34                   | 41                   | 49                   | 53                   | 55                   | 56                   | 57                   | 57                   | 57                   | 57                   | 57                   | 57                   |
| <b>Estimate (95% CI)</b>         |         |                      |                      |                      |                      |                      |                      |                      |                      |                      |                      |                      |                      |                      |                      |                      |
| Vaccine                          | 0       | 0.012 (0.001; 0.071) | 0.022 (0.001; 0.071) | 0.034 (0.001; 0.071) | 0.046 (0.001; 0.088) | 0.054 (0.001; 0.088) | 0.056 (0.001; 0.090) | 0.060 (0.001; 0.090) | 0.066 (0.001; 0.105) | 0.070 (0.001; 0.105) | 0.070 (0.001; 0.105) | 0.070 (0.001; 0.105) | 0.070 (0.001; 0.105) | 0.070 (0.001; 0.105) | 0.070 (0.001; 0.105) | 0.070 (0.001; 0.105) |
| Placebo                          | 0       | 0.012 (0.001; 0.081) | 0.031 (0.001; 0.081) | 0.044 (0.001; 0.081) | 0.058 (0.001; 0.100) | 0.071 (0.001; 0.100) | 0.081 (0.001; 0.100) | 0.089 (0.001; 0.100) | 0.099 (0.001; 0.100) | 0.100 (0.001; 0.100) | 0.100 (0.001; 0.100) | 0.100 (0.001; 0.100) | 0.100 (0.001; 0.100) | 0.100 (0.001; 0.100) | 0.100 (0.001; 0.100) | 0.100 (0.001; 0.100) |



**C. Randomized (non-naïve Day 01)**

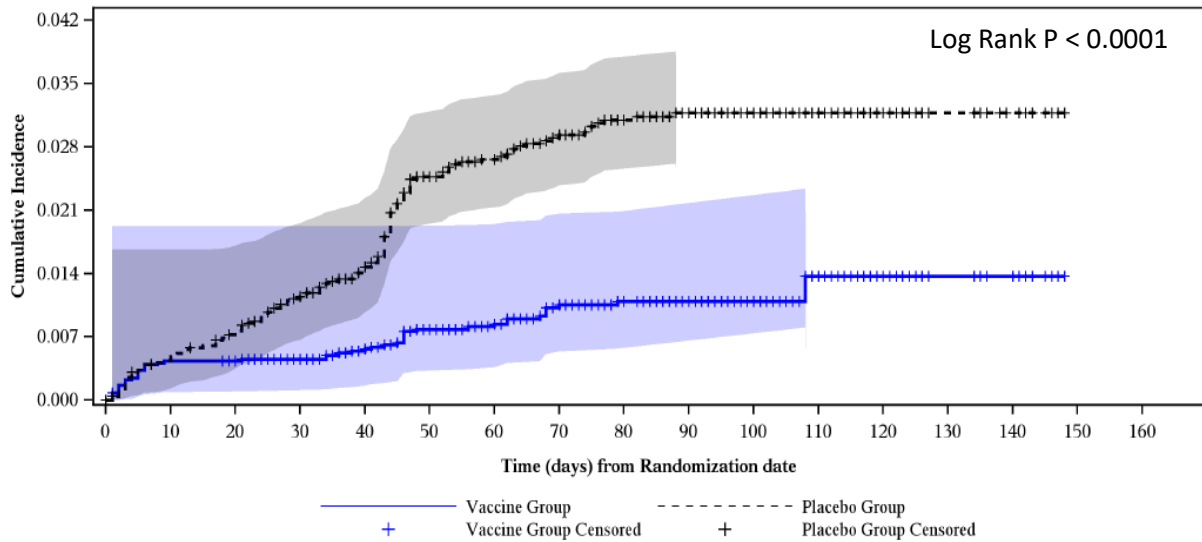

|                                  | 0               | 10                                     | 20                                     | 30                                     | 40                                     | 50                                     | 60                                     | 70                                     | 80                                     | 90                                     | 100                                    | 110                                    | 120                                    | 130                                    | 140                                    | 148                                    |
|----------------------------------|-----------------|----------------------------------------|----------------------------------------|----------------------------------------|----------------------------------------|----------------------------------------|----------------------------------------|----------------------------------------|----------------------------------------|----------------------------------------|----------------------------------------|----------------------------------------|----------------------------------------|----------------------------------------|----------------------------------------|----------------------------------------|
| <b>Number at risk (Censored)</b> |                 |                                        |                                        |                                        |                                        |                                        |                                        |                                        |                                        |                                        |                                        |                                        |                                        |                                        |                                        |                                        |
| Vaccine                          | 48<br>64<br>(0) | 482<br>7<br>(16)                       | 482<br>5<br>(18)                       | 477<br>7<br>(65)                       | 437<br>6<br>(46<br>2)                  | 376<br>4<br>(10<br>64)                 | 345<br>3<br>(13<br>74)                 | 313<br>5<br>(16<br>85)                 | 280<br>7<br>(20<br>11)                 | 191<br>7<br>(29<br>01)                 | 601<br>(42<br>17)                      | 338<br>(44<br>79)                      | 123<br>(46<br>94)                      | 22<br>(47<br>95)                       | 18<br>(47<br>99)                       | 0<br>(48<br>17)                        |
| Placebo                          | 48<br>38<br>(0) | 480<br>1<br>(16)                       | 478<br>3<br>(20)                       | 472<br>5<br>(59)                       | 431<br>5<br>(54<br>6)                  | 369<br>3<br>(10<br>34)                 | 339<br>0<br>(13<br>30)                 | 308<br>7<br>(16<br>25)                 | 274<br>2<br>(19<br>64)                 | 184<br>2<br>(28<br>62)                 | 593<br>(41<br>11)                      | 33<br>(43<br>73)                       | 118<br>(45<br>86)                      | 25<br>(46<br>79)                       | 17<br>(46<br>87)                       | 0<br>(47<br>04)                        |
| <b>Cumulative events</b>         |                 |                                        |                                        |                                        |                                        |                                        |                                        |                                        |                                        |                                        |                                        |                                        |                                        |                                        |                                        |                                        |
| Vaccine                          | 0               | 21                                     | 21                                     | 22                                     | 27                                     | 36                                     | 38                                     | 45                                     | 46                                     | 46                                     | 46                                     | 47                                     | 47                                     | 47                                     | 47                                     | 47                                     |
| Placebo                          | 0               | 23                                     | 37                                     | 55                                     | 70                                     | 111                                    | 118                                    | 127                                    | 132                                    | 134                                    | 134                                    | 134                                    | 134                                    | 134                                    | 134                                    | 134                                    |
| <b>Estimate (95% CI)</b>         |                 |                                        |                                        |                                        |                                        |                                        |                                        |                                        |                                        |                                        |                                        |                                        |                                        |                                        |                                        |                                        |
| Vaccine                          | 0               | 0.0<br>04<br>(0.0<br>01;<br>0.0<br>19) | 0.0<br>04<br>(0.0<br>01;<br>0.0<br>19) | 0.0<br>05<br>(0.0<br>01;<br>0.0<br>19) | 0.0<br>06<br>(0.0<br>02;<br>0.0<br>19) | 0.0<br>08<br>(0.0<br>03;<br>0.0<br>19) | 0.0<br>08<br>(0.0<br>04;<br>0.0<br>19) | 0.0<br>11<br>(0.0<br>05;<br>0.0<br>21) | 0.0<br>11<br>(0.0<br>06;<br>0.0<br>21) | 0.0<br>11<br>(0.0<br>06;<br>0.0<br>21) | 0.0<br>11<br>(0.0<br>06;<br>0.0<br>21) | 0.0<br>14<br>(0.0<br>08;<br>0.0<br>23) | 0.0<br>14<br>(0.0<br>08;<br>0.0<br>23) | 0.0<br>14<br>(0.0<br>08;<br>0.0<br>23) | 0.0<br>14<br>(0.0<br>08;<br>0.0<br>23) | 0.0<br>14<br>(0.0<br>08;<br>0.0<br>23) |
| Placebo                          | 0               | 0.0<br>05<br>(0.0<br>01;<br>0.0<br>17) | 0.0<br>08<br>(0.0<br>03;<br>0.0<br>17) | 0.0<br>11<br>(0.0<br>07;<br>0.0<br>20) | 0.0<br>15<br>(0.0<br>10;<br>0.0<br>22) | 0.0<br>25<br>(0.0<br>19;<br>0.0<br>32) | 0.0<br>27<br>(0.0<br>21;<br>0.0<br>34) | 0.0<br>29<br>(0.0<br>24;<br>0.0<br>36) | 0.0<br>31<br>(0.0<br>25;<br>0.0<br>38) | 0.0<br>32<br>(0.0<br>26;<br>0.0<br>39) |

## 2.10 Survival analyses based on the Stratified Cox proportional hazard model

Based on the Stratified Cox proportional hazard model, the VE for symptomatic COVID-19 was 64.3% (95% CI: 46.5; 76.2), the VE for severe COVID-19 was -58.2 (95% CI -847.1; 73.6) and the VE for hospitalized COVID-19 was 100.0 (95% CI NC; 100.0).

## 2.11 Vaccine efficacy in the mFAS-PD1 subset

All cases correspond to one episode.

|                                     | <b>Vaccine group<br/>(n=6,418)</b> | <b>Placebo group<br/>(n=6,391)</b> | <b>Vaccine efficacy,<br/>% (95% CI)</b> |
|-------------------------------------|------------------------------------|------------------------------------|-----------------------------------------|
| <b>Symptomatic COVID-19</b>         |                                    |                                    |                                         |
| Cases                               | 68                                 | 169                                | ..                                      |
| 1000 person-years at risk           | 1·069                              | 1·055                              | ..                                      |
| Incidence rate<br>(95% CI)          | 63·593<br>(49·38–80·62)            | 160·144<br>(136·91–186·19)         | 60·3<br>(47·1–70·5)                     |
| Participants at risk, n             | 6,418                              | 6,390                              | ..                                      |
| Cumulative incidence,<br>% (95% CI) | 1·1<br>(0·8–1·3)                   | 2·6<br>(2·3–3·1)                   | 59·9<br>(46·6–70·2)                     |
| <b>Severe COVID-19</b>              |                                    |                                    |                                         |
| Cases                               | 6                                  | 8                                  | ..                                      |
| 1000 person-years at risk           | 1·069                              | 1·055                              | ..                                      |
| Incidence rate<br>(95% CI)          | 5·611<br>(2·06–12·21)              | 7·581<br>(3·27–14·94)              | 26·0<br>(-143·3–78·8)                   |
| Participants at risk, n             | 6,418                              | 6,390                              | ..                                      |
| Cumulative incidence,<br>% (95% CI) | 0·1 (0–0·2)                        | 0·1 (0·1–0·2)                      | 25·3<br>(-145·4–78·6)                   |

Incidence rate: cases per 1000 person-years at risk

Subjects at risk: subjects with censor date after 14 days post-injection 1 in the analysis population

Cumulative incidence: cases divided by number of subjects at risk in each group \* 100

CI, confidence interval.

## 2.12 Kaplan-Meier cumulative incidence of symptomatic COVID-19 in the mFAS-PD1 population (overall, naïve and non-naïve populations)

### A. Overall

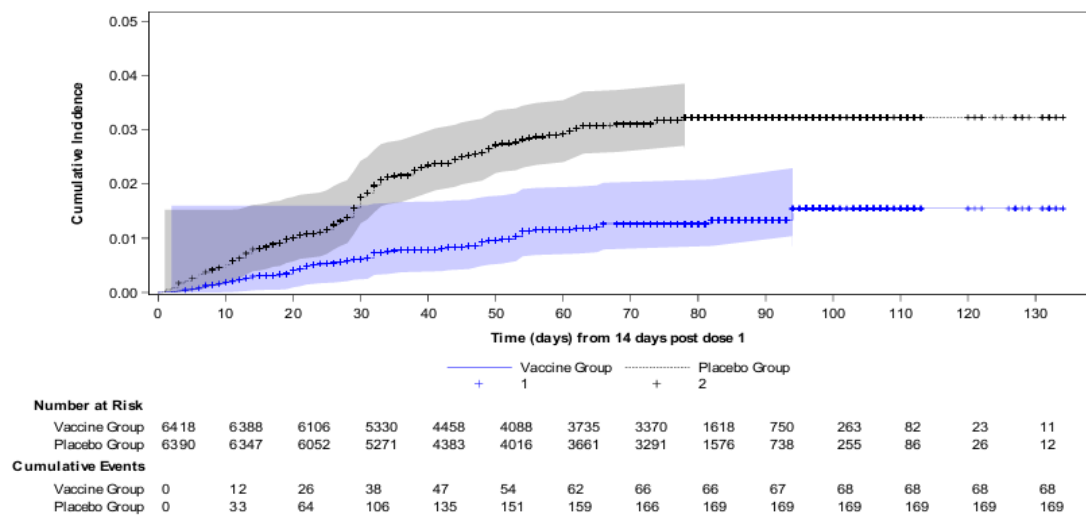

### B. Naïve at baseline

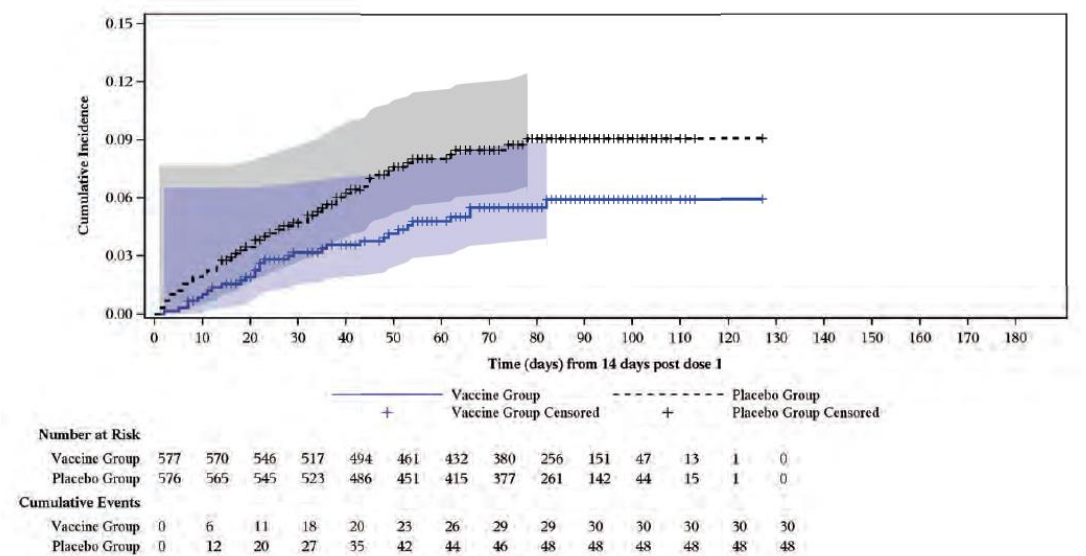

### C. Non-naïve at baseline

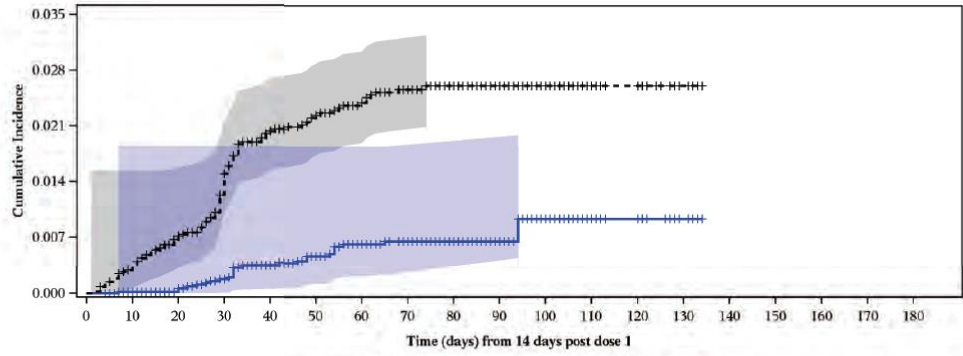

|                          | Vaccine Group          |      |      |      |      |      |      |      |      |     | Placebo Group          |     |     |     |     |  |  |  |  |  |
|--------------------------|------------------------|------|------|------|------|------|------|------|------|-----|------------------------|-----|-----|-----|-----|--|--|--|--|--|
|                          | +                      |      |      |      |      |      |      |      |      |     | +                      |     |     |     |     |  |  |  |  |  |
|                          | Vaccine Group Censored |      |      |      |      |      |      |      |      |     | Placebo Group Censored |     |     |     |     |  |  |  |  |  |
| <b>Number at Risk</b>    |                        |      |      |      |      |      |      |      |      |     |                        |     |     |     |     |  |  |  |  |  |
| Vaccine Group            | 4826                   | 4809 | 4604 | 4120 | 3571 | 3347 | 3037 | 2745 | 1190 | 513 | 205                    | 69  | 22  | 11  | 0   |  |  |  |  |  |
| Placebo Group            | 4792                   | 4764 | 4544 | 4054 | 3492 | 3287 | 2985 | 2672 | 1136 | 512 | 203                    | 71  | 25  | 12  | 0   |  |  |  |  |  |
| <b>Cumulative Events</b> |                        |      |      |      |      |      |      |      |      |     |                        |     |     |     |     |  |  |  |  |  |
| Vaccine Group            | 0                      | 1    | 3    | 8    | 15   | 19   | 24   | 25   | 25   | 25  | 26                     | 26  | 26  | 26  | 26  |  |  |  |  |  |
| Placebo Group            | 0                      | 16   | 34   | 67   | 88   | 95   | 100  | 105  | 106  | 106 | 106                    | 106 | 106 | 106 | 106 |  |  |  |  |  |

## 2.13 Vaccine efficacy in the mFAS-PD2 population according to country, race/ethnic subgroups and risk of severe disease

|                                     |                                     | Vaccine group<br>(n=5,736) | Placebo group (n=5,680) | Vaccine efficacy,<br>% (95% CI) |
|-------------------------------------|-------------------------------------|----------------------------|-------------------------|---------------------------------|
| <b>Country</b>                      | <b>Colombia</b>                     |                            |                         |                                 |
|                                     | Cases                               | 3                          | 7                       | ..                              |
|                                     | 1000 person-years at risk           | 0.020                      | 0.018                   | ..                              |
|                                     | Incidence rate<br>(95% CI)          | 149.938 (30.92–438.18)     | 385.459 (154.97–795.19) | 61.1<br>(-70.4–93.5)            |
|                                     | Participants at risk, n             | 328                        | 319                     | ..                              |
|                                     | Cumulative incidence,<br>% (95% CI) | 0.9 (0.2–2.6)              | 2.2 (0.9–4.5)           | 58.3<br>(-82.6–93.0)            |
|                                     | <b>Ghana</b>                        |                            |                         |                                 |
|                                     | Cases                               | 0                          | 1                       | ..                              |
|                                     | 1000 person-years at risk           | 0.007                      | 0.068                   | ..                              |
|                                     | Incidence rate<br>(95% CI)          | 0 (0–558.38)               | 14.635<br>(0.37–81.54)  | 100 (-3614.1–100.0)             |
|                                     | Participants at risk, n             | 570                        | 548                     | ..                              |
|                                     | Cumulative incidence,<br>% (95% CI) | 0 (0–0.6)                  | 0.2 (0–1.0)             | 100 (-3649.5–100.0)             |
|                                     | <b>India</b>                        |                            |                         |                                 |
|                                     | Cases                               | 6                          | 29                      | ..                              |
|                                     | 1000 person-years at risk           | 0.199                      | 0.196                   | ..                              |
|                                     | Incidence rate<br>(95% CI)          | 30.188<br>(11.08–65.71)    | 148.129 (99.2–212.74)   | 79.6<br>(50.0–93.1)             |
|                                     | Participants at risk, n             | 1628                       | 1618                    | ..                              |
|                                     | Cumulative incidence,<br>% (95% CI) | 0.4 (0.1–0.8)              | 1.8 (1.2–2.6)           | 79.4<br>(49.6–93.0)             |
|                                     | <b>Kenya</b>                        |                            |                         |                                 |
|                                     | Cases                               | 3                          | 7                       | ..                              |
| 1000 person-years at risk           | 0.151                               | 0.149                      | ..                      |                                 |
| Incidence rate<br>(95% CI)          | 19.915<br>(4.11–58.20)              | 47.042<br>(18.91–96.93)    | 57.7<br>(-85.4–92.9)    |                                 |
| Participants at risk, n             | 1620                                | 1614                       | ..                      |                                 |
| Cumulative incidence,<br>% (95% CI) | 0.2 (0–0.5)                         | 0.4 (0.2–0.9)              | 57.3<br>(-87.0–92.9)    |                                 |
| <b>Mexico</b>                       |                                     |                            |                         |                                 |
| Cases                               | 18                                  | 31                         | ..                      |                                 |
| 1000 person-years at risk           | 0.042                               | 0.040                      | ..                      |                                 |
| Incidence rate<br>(95% CI)          | 432.590 (256.38–683.68)             | 772.357 (524.78–1096.30)   | 44.0<br>(-3.3–70.5)     |                                 |
| Participants at risk, n             | 320                                 | 317                        | ..                      |                                 |
| Cumulative incidence,<br>% (95% CI) | 5.6 (3.4–8.7)                       | 9.8 (6.7–13.6)             | 42.5<br>(-6.1–69.7)     |                                 |
| <b>Nepal</b>                        |                                     |                            |                         |                                 |
| Cases                               | 2                                   | 14                         | ..                      |                                 |
| 1000 person-years at risk           | 0.115                               | 0.115                      | ..                      |                                 |
| Incidence rate<br>(95% CI)          | 17.400<br>(2.11–62.86)              | 121.860 (66.62–204.46)     | 85.7<br>(37.8–98.4)     |                                 |
| Participants at risk, n             | 738                                 | 760                        | –                       |                                 |
| Cumulative incidence,<br>% (95% CI) | 0.3 (0–1.0)                         | 1.8 (1.0–3.1)              | 85.3<br>(35.9–98.4)     |                                 |
| <b>Uganda</b>                       |                                     |                            |                         |                                 |
| Cases                               | 0                                   | 0                          | ..                      |                                 |
| 1000 person-years at risk           | 0.007                               | 0.007                      | ..                      |                                 |
| Incidence rate<br>(95% CI)          | 0 (0–558.38)                        | 0 (0–545.05)               | Not computed            |                                 |
| Participants at risk, n             | 107                                 | 2376                       | ..                      |                                 |

|                                    |                                          |                         |                          |                    |
|------------------------------------|------------------------------------------|-------------------------|--------------------------|--------------------|
|                                    | Cumulative incidence, % (95% CI)         | 0 (0–3.4)               | 1.8 (1.3–2.4)            | Not computed       |
| <b>Race/<br/>Ethnicity</b>         | <b>Asian</b>                             |                         |                          |                    |
|                                    | Cases                                    | 8                       | 42                       | ..                 |
|                                    | 1000 person-years at risk                | 0.313                   | 0.310                    | ..                 |
|                                    | Incidence rate (95% CI)                  | 25.539 (11.03–50.32)    | 135.278 (97.50–182.86)   | 81.1 (59.3–92.3)   |
|                                    | Participants at risk, n                  | 2363                    | 2376                     | ..                 |
|                                    | Cumulative incidence, % (95% CI)         | 0.3 (0.1–0.7)           | 1.8 (1.3–2.4)            | 80.8 (58.7–92.2)   |
|                                    | <b>Black African or African American</b> |                         |                          |                    |
|                                    | Cases                                    | 3                       | 8                        | ..                 |
|                                    | 1000 person-years at risk                | 0.228                   | 0.223                    | ..                 |
|                                    | Incidence rate (95% CI)                  | 13.134 (2.71–38.38)     | 35.862 (15.48–70.66)     | 63.4 (-52.6–93.7)  |
|                                    | Participants at risk, n                  | 2295                    | 2268                     | ..                 |
|                                    | Cumulative incidence, % (95% CI)         | 0.1 (0–0.4)             | 0.4 (0.2–0.7)            | 62.9 (-54.4–93.7)  |
| <b>At risk of severe COVID-19*</b> | <b>Aged 18–59 years</b>                  |                         |                          |                    |
|                                    | Cases                                    | 10                      | 28                       | ..                 |
|                                    | 1000 person-years at risk                | 0.164                   | 0.156                    | ..                 |
|                                    | Incidence rate (95% CI)                  | 60.829 (29.17–111.87)   | 179.727 (119.43–259.76)  | 66.2 (28.2–85.3)   |
|                                    | Participants at risk, n                  | 1429                    | 1431                     | ..                 |
|                                    | Cumulative incidence, % (95% CI)         | 0.7 (0.3–1.3)           | 2.0 (1.3–2.8)            | 64.2 (24.1–84.5)   |
|                                    | <b>Aged ≥65 years</b>                    |                         |                          |                    |
|                                    | Cases                                    | 1                       | 0                        | ..                 |
|                                    | 1000 person-years at risk                | 0.009                   | 0.009                    | ..                 |
|                                    | Incidence rate (95% CI)                  | 110.883 (2.81–617.80)   | 0 (0–409.53)             | Not computed       |
|                                    | Participants at risk, n                  | 83                      | 82                       | ..                 |
|                                    | Cumulative incidence, % (95% CI)         | 1.2 (0–6.5)             | 0 (0–4.4)                | Not computed       |
| <b>BMI</b>                         | <b>Aged 18–59 years and BMI ≥30</b>      |                         |                          |                    |
|                                    | Cases                                    | 5                       | 9                        | ..                 |
|                                    | 1000 person-years at risk                | 0.048                   | 0.043                    | ..                 |
|                                    | Incidence rate (95% CI)                  | 104.155 (33.82; 243.06) | 211.236 (96.59; 400.99)  | 50.7 (-63.8; 87.0) |
|                                    | Participants at risk, n                  | 430                     | 399                      | ..                 |
|                                    | Cumulative incidence, % (95% CI)         | 1.2 (0.4; 2.7)          | 2.3 (1.0; 4.2)           | 48.4 (-71.3; 86.4) |
|                                    | <b>Aged 18–59 years and BMI &lt;30</b>   |                         |                          |                    |
|                                    | Cases                                    | 24                      | 78                       | ..                 |
|                                    | 1000 person-years at risk                | 0.524                   | 0.518                    | ..                 |
|                                    | Incidence rate (95% CI)                  | 45.798 (29.34; 68.14)   | 150.437 (118.91; 187.75) | 69.6 (51.4; 81.6)  |
|                                    | Participants at risk, n                  | 4570                    | 4581                     | ..                 |
|                                    | Cumulative incidence, % (95% CI)         | 0.5 (0.3; 0.8)          | 1.7 (1.3; 2.1)           | 69.2 (50.7; 81.3)  |
|                                    | <b>Aged ≥60 years and BMI ≥30</b>        |                         |                          |                    |

|  |                                      |                        |                       |                       |
|--|--------------------------------------|------------------------|-----------------------|-----------------------|
|  | Cases                                | 0                      | 0                     | ..                    |
|  | 1000 person-years at risk            | 0.002                  | 0.004                 | ..                    |
|  | Incidence rate<br>(95% CI)           | 0 (0; 2101.97)         | 0 (0; 873.21)         | Not computable        |
|  | Participants at risk, n              | 19                     | 43                    | ..                    |
|  | Cumulative incidence,<br>% (95% CI)  | 0 (0; 17.6)            | 0 (0; 8.2)            | Not computable        |
|  | <b>Aged ≥60 years and BMI &lt;30</b> |                        |                       |                       |
|  | Cases                                | 3                      | 2                     | ..                    |
|  | 1000 person-years at risk            | 0.031                  | 0.028                 | ..                    |
|  | Incidence rate<br>(95% CI)           | 98.326 (20.28; 287.35) | 72.622 (8.79; 262.33) | -35.4 (-1521.1; 84.5) |
|  | Participants at risk, n              | 292                    | 264                   | ..                    |
|  | Cumulative incidence,<br>% (95% CI)  | 1.0 (0.2; 3.0)         | 0.8 (0.1; 2.7)        | -35.6 (-1523.7; 84.5) |

\*Comorbidities associated with increased risk of severe COVID-19 are listed above. All cases correspond to one episode. Incidence rate” is the “incidence expressed by 1000 patient-years at risk.

CI, confidence interval.



## 2.14 Vaccine efficacy against asymptomatic SARS-CoV-2 infection in naïve participants

Cases: number of subjects with  $\geq 1$  occurrence of relevant endpoint from 14 days post-injection (1 or 2 as applicable) in the analysis population.

|                                     | mFAS-PD1 Naïve-D1        |                          |                                    | mFAS-PD2 Naïve-D1+D22    |                          |                                    |
|-------------------------------------|--------------------------|--------------------------|------------------------------------|--------------------------|--------------------------|------------------------------------|
|                                     | Vaccine group<br>(n=577) | Placebo group<br>(n=576) | Vaccine efficacy,<br>%<br>(95% CI) | Vaccine group<br>(n=315) | Placebo group<br>(n=333) | Vaccine efficacy,<br>%<br>(95% CI) |
| Cases                               | 275                      | 266                      |                                    | 100                      | 107                      |                                    |
| Cumulative incidence,<br>% (95% CI) | 47.7 (43.5–51.8)         | 46.2 (42.1–50.3)         | -3.2<br>(-22.6–13.1)               | 31.7 (26.6–37.2)         | 32.1 (27.1–37.4)         | 1.2<br>(-31.0–25.5)                |

mFAS-PD1, modified full analysis set post dose 1; mFAS-PD2, modified full analysis set post dose 2.

## 2.15 Cumulative incidence of symptomatic Omicron infections in the mFAS-PD2 set

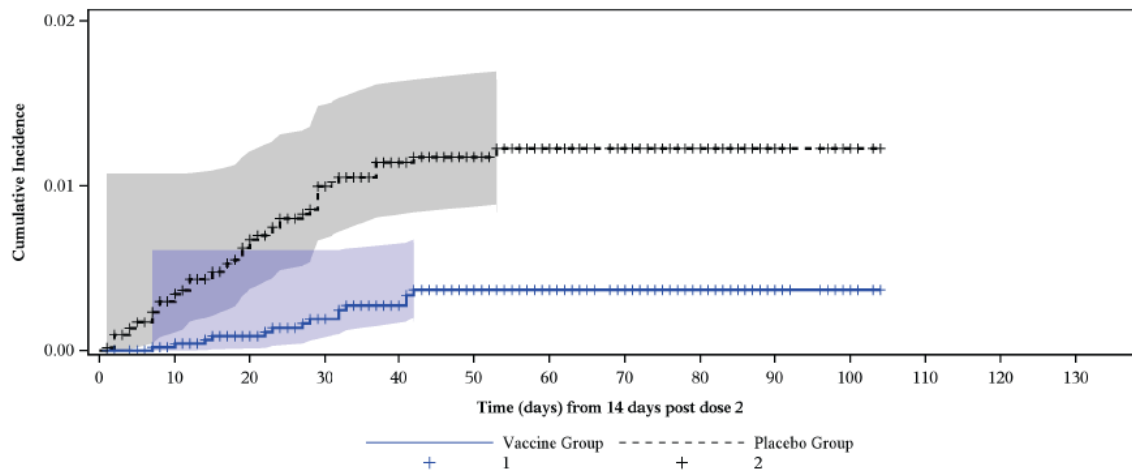

|                          | 0    | 10   | 20   | 30   | 40   | 50   | 60   | 70  | 80  | 90 | 100 | 110 |
|--------------------------|------|------|------|------|------|------|------|-----|-----|----|-----|-----|
| <b>Number at Risk</b>    |      |      |      |      |      |      |      |     |     |    |     |     |
| Vaccine Group            | 5311 | 4512 | 4142 | 3604 | 3295 | 2227 | 1017 | 559 | 220 | 30 | 16  | 0   |
| Placebo Group            | 5287 | 4441 | 4071 | 3519 | 3232 | 2169 | 977  | 539 | 219 | 36 | 14  | 0   |
| <b>Cumulative Events</b> |      |      |      |      |      |      |      |     |     |    |     |     |
| Vaccine Group            | 0    | 2    | 4    | 8    | 11   | 14   | 14   | 14  | 14  | 14 | 14  | 14  |
| Placebo Group            | 0    | 17   | 31   | 43   | 48   | 49   | 50   | 50  | 50  | 50 | 50  | 50  |

## 2.16 Sensitivity analysis: efficacy against Symptomatic COVID-19 caused by Omicron or undefined variants in the mFAS-PD2 population

|                           | Vaccine group<br>(n=5,736) |                                     |                             | Placebo group<br>(n=5,680) |                                 |                             | Vaccine efficacy, %<br>(95% CI) |
|---------------------------|----------------------------|-------------------------------------|-----------------------------|----------------------------|---------------------------------|-----------------------------|---------------------------------|
|                           | Cases                      | 1000<br>Person-<br>years at<br>risk | Incidence rate<br>(95% CI)  | Cases                      | 1000<br>Person-years<br>at risk | Incidence rate<br>(95% CI)  |                                 |
| All participants          | 32                         | 0.604                               | 52.953<br>(36.22; 74.75)    | 85                         | 0.593                           | 143.373(114.52;<br>177.28)  | 63.1<br>(43.9; 76.2)            |
| Naïve participants        | 15                         | 0.048                               | 312.233<br>(174.75; 514.98) | 21                         | 0.049                           | 431.495<br>(267.10; 659.59) | 27.6<br>(-47.3; 65.3)           |
| Non-naïve<br>participants | 16                         | 0.528                               | 30.306<br>(17.32; 49.22)    | 60                         | 0.518                           | 115.722<br>(88.31; 148.96)  | 73.8<br>(53.9; 85.9)            |

Cases: number of participants with  $\geq 1$  symptomatic COVID-19 episode from 14 days post-injection 2 in the analysis population

Cumulative incidence: cases divided by the number of participants in each group \* 100

CI, confidence interval.

## 2.17 Safety overview after injection 1 and injection 2 in all participants – RsafAS/SafAS

|                                                            | Post injection 1       |      |               |                        |      |               | Post injection 2       |      |               |                        |      |               |
|------------------------------------------------------------|------------------------|------|---------------|------------------------|------|---------------|------------------------|------|---------------|------------------------|------|---------------|
|                                                            | Vaccine group (N=6472) |      |               | Placebo group (N=6450) |      |               | Vaccine group (N=5788) |      |               | Placebo group (N=5755) |      |               |
| Participants experiencing at least one:                    | n/M                    | %    | 95% CI        |
| SafAS                                                      |                        |      |               |                        |      |               |                        |      |               |                        |      |               |
| Within 30 minutes after injection                          |                        |      |               |                        |      |               |                        |      |               |                        |      |               |
| Immediate unsolicited AE                                   | 4/6472                 | <0.1 | (0; 0.2)      | 4/6450                 | <0.1 | (0; 0.2)      | 0/5788                 | 0    | (0; 0.1)      | 3/5755                 | <0.1 | (0; 0.2)      |
| Immediate unsolicited AR                                   | 4/6472                 | <0.1 | (0; 0.2)      | 3/6450                 | <0.1 | (0; 0.1)      | 0/5788                 | 0    | (0; 0.1)      | 3/5755                 | <0.1 | (0; 0.2)      |
| RSafAS                                                     |                        |      |               |                        |      |               |                        |      |               |                        |      |               |
| Solicited reaction within solicited period after injection |                        |      |               |                        |      |               |                        |      |               |                        |      |               |
| Solicited reaction                                         | 1119/2420              | 46.2 | (44.2 ; 48.3) | 685/2403               | 28.5 | (26.7 ; 30.4) | 911/2271               | 40.1 | (38.1 ; 42.2) | 629/2259               | 27.8 | (26.0 ; 29.7) |
| Grade 3 solicited reaction                                 | 124/2420               | 5.1  | (4.3; 6.1)    | 82/2403                | 3.4  | (2.7; 4.2)    | 110/2271               | 4.8  | (4.0; 5.8)    | 57/2259                | 2.5  | (1.9; 3.3)    |
| Solicited injection site reaction                          | 862/2419               | 35.6 | (33.7 ; 37.6) | 412/2403               | 17.1 | (15.7 ; 18.7) | 720/2270               | 31.7 | (29.8 ; 33.7) | 376/2258               | 16.7 | (15.1 ; 18.3) |
| Grade 3 solicited injection site reaction                  | 58/2419                | 2.4  | (1.8; 3.1)    | 30/2403                | 1.2  | (0.8; 1.8)    | 54/2270                | 2.4  | (1.8; 3.1)    | 20/2258                | 0.9  | (0.5; 1.4)    |
| Solicited systemic reaction                                | 818/2420               | 33.8 | (31.9 ; 35.7) | 560/2403               | 23.3 | (21.6 ; 25.0) | 690/2271               | 30.4 | (28.5 ; 32.3) | 520/2259               | 23.0 | (21.3 ; 24.8) |
| Grade 3 solicited systemic reaction                        | 104/2420               | 4.3  | (3.5; 5.2)    | 75/2403                | 3.1  | (2.5; 3.9)    | 91/2271                | 4.0  | (3.2; 4.9)    | 52/2259                | 2.3  | (1.7; 3.0)    |
| Within 21 days after injection                             |                        |      |               |                        |      |               |                        |      |               |                        |      |               |
| Unsolicited AE                                             | 97/2433                | 4.0  | (3.2; 4.8)    | 113/2418               | 4.7  | (3.9; 5.6)    | 78/2276                | 3.4  | (2.7; 4.3)    | 99/2271                | 4.4  | (3.6; 5.3)    |
| Unsolicited AR                                             | 14/2433                | 0.6  | (0.3; 1.0)    | 11/2418                | 0.5  | (0.2; 0.8)    | 13/2276                | 0.6  | (0.3; 1.0)    | 5/2271                 | 0.2  | (0.1; 0.5)    |
| Unsolicited non-serious AE                                 | 90/2433                | 3.7  | (3.0; 4.5)    | 108/2418               | 4.5  | (3.7; 5.4)    | 75/2276                | 3.3  | (2.6; 4.1)    | 96/2271                | 4.2  | (3.4; 5.1)    |
| Unsolicited non-serious AR                                 | 14/2433                | 0.6  | (0.3; 1.0)    | 11/2418                | 0.5  | (0.2; 0.8)    | 13/2276                | 0.6  | (0.3; 1.0)    | 5/2271                 | 0.2  | (0.1; 0.5)    |
| Unsolicited non-serious injection site AR                  | 3/2433                 | 0.1  | (0; 0.4)      | 0/2418                 | 0    | (0; 0.2)      | 1/2276                 | <0.1 | (0; 0.2)      | 0/2271                 | 0    | (0; 0.2)      |
| Unsolicited non-serious systemic AE                        | 87/2433                | 3.6  | (2.9; 4.4)    | 108/2418               | 4.5  | (3.7; 5.4)    | 74/2276                | 3.3  | (2.6; 4.1)    | 96/2271                | 4.2  | (3.4; 5.1)    |
| Participants experiencing at least one:                    |                        |      |               |                        |      |               |                        |      |               |                        |      |               |
| Unsolicited non-serious systemic                           | 11/2433                | 0.5  | (0.2; 0.8)    | 11/2418                | 0.5  | (0.2; 0.8)    | 12/2276                | 0.5  | (0.3; 0.9)    | 5/2271                 | 0.2  | (0.1; 0.5)    |

|                                     |          |      |            |          |      |            |          |     |            |          |      |            |
|-------------------------------------|----------|------|------------|----------|------|------------|----------|-----|------------|----------|------|------------|
| AR                                  |          |      |            |          |      |            |          |     |            |          |      |            |
| SafAS                               |          |      |            |          |      |            |          |     |            |          |      |            |
| Within 21 days after injection      |          |      |            |          |      |            |          |     |            |          |      |            |
| AE leading to study discontinuation | 2/6472   | <0.1 | (0; 0.1)   | 0/6450   | 0    | (0; 0.1)   | 0/5788   | 0   | (0; 0.1)   | 2/5755   | <0.1 | (0; 0.1)   |
| SAE                                 | 11/6472  | 0.2  | (0.1; 0.3) | 8/6450   | 0.1  | (0.1; 0.2) | 6/5788   | 0.1 | (0; 0.2)   | 6/5755   | 0.1  | (0; 0.2)   |
| Death                               | 1/6472   | <0.1 | (0; 0.1)   | 0/6450   | 0    | (0; 0.1)   | 0/5788   | 0   | (0; 0.1)   | 2/5755   | <0.1 | (0; 0.1)   |
| AESI (including pIMDs)              | 1/6472   | <0.1 | (0; 0.1)   | 1/6450   | <0.1 | (0; 0.1)   | 0/5788   | 0   | (0; 0.1)   | 0/5755   | 0    | (0; 0.1)   |
| MAAE                                | 169/6472 | 2.6  | (2.2; 3.0) | 172/6450 | 2.7  | (2.3; 3.1) | 101/5788 | 1.7 | (1.4; 2.1) | 112/5755 | 1.9  | (1.6; 2.3) |

Abbreviations: AE: adverse event; AESI: adverse event of special interest; AR: adverse reaction; MAAE: medically attended adverse event; pIMDs: potential immune-mediated diseases; RSafAS, reactogenicity safety analysis set; SAE: serious adverse event; SafAS, safety analysis set.

n: number of participants experiencing the endpoint; M: number of participants with available data for the relevant endpoint

## 2.18 Additional safety outcomes

- Observed SISR and SSRs were mostly mild to moderate in severity, started within 3 days after the injection and spontaneously resolved within 1–3 days. The type, incidence and severity of SISR and SSRs were comparable after both injections, irrespective of participant age.
- Ten (<0.1%) participants (five [<0.1%] in the Vaccine Group and five [<0.1%] in the Placebo Group), reported discontinuation from the study due to an AE; all AEs were assessed as not related to the study intervention.
- Up to the analysis cut-off date, 49 participants reported a pregnancy. Based on limited data (pregnancy precluded eligibility to the study), no safety concern was identified among pregnant women.
- There was no evidence of an increased risk of severe COVID-19 in the vaccine group compared with the placebo group. There were no fatal COVID-19 cases and a limited number of severe COVID-19 and hospitalized COVID-19 cases.

## References

1. Andrews N, Stowe J, Kirsebom F, et al. Covid-19 Vaccine Effectiveness against the Omicron (B.1.1.529) Variant. *N Engl J Med* 2022;386:1532-46.
2. Breslow NE, Day NE. *Statistical methods in cancer research. Volume II--The design and analysis of cohort studies.* IARC scientific publications 1987:1-406.
